# The Mitochondrial Permeability Transition Phenomenon Elucidated by Cryo-EM Reveals the Genuine Impact of Calcium Overload on Mitochondrial Structure and Function

Jasiel O. Strubbe-Rivera<sup>1</sup>, Jason R. Schrad<sup>2</sup>, Evgeny V. Pavlov<sup>3</sup>, James F. Conway<sup>4</sup>, Kristin N. Parent<sup>2</sup> and Jason N. Bazil<sup>5</sup>

<sup>1</sup>Pharmacology and Toxicology, Michigan State University, East Lansing, MI; <sup>2</sup>Biochemistry and Molecular Biology, Michigan State University, East Lansing, MI; <sup>3</sup>Basic Science and Craniofacial Biology, New York University, New York, NY; <sup>4</sup>Structural Biology, University of Pittsburgh School of Medicine, Pittsburgh, PA; <sup>5</sup>Physiology, Michigan State University, East Lansing, MI

## Abstract

Mitochondria have a remarkable ability to uptake and store massive amounts of calcium. However, the consequences of massive calcium accumulation remain enigmatic. In the present study, we analyzed a series of time-course experiments to identify the sequence of events that occur in a population of guinea pig cardiac mitochondria exposed to excessive calcium overload that cause mitochondrial permeability transition (MPT). By analyzing coincident structural and functional data, we determined that excessive calcium overload is associated with large calcium phosphate granules and inner membrane fragmentation, which explains the extent of mitochondrial dysfunction. This data also reveals a novel mechanism for cyclosporin A, an inhibitor of MPT, in which it preserves inner membrane architecture despite the presence of massive calcium phosphate granules in the matrix. Overall, these findings establish a mechanism of calcium-induced mitochondrial dysfunction and the impact of calcium regulation on mitochondrial structure and function.

## Introduction

Mitochondria regulate cell fate through a variety of means (Frank et al., 2001; Halestrap & Pasdois, 2009; Tait & Green, 2013; Youle & Karbowski, 2005; Youle & Narendra, 2011). Their extensive networks and dynamic architecture facilitate metabolic signaling to ensure proper cellular function and survival. Mitochondria achieve this by integrating intracellular cues and physiological stimuli to regulate ATP production, metabolite oxidation, calcium signaling, phospholipid and steroid hormone biosynthesis, and mitochondrial fission and fusion processes (Balaban, 2002; Eisner, Picard, & Hajnoczky, 2018; Friedman & Nunnari, 2014; Glancy, Willis, Chess, & Balaban, 2013; Mannella, Lederer, & Jafri, 2013; Marchi, Patergnani, & Pinton, 2014; Pfanner, Warscheid, & Wiedemann, 2019; Wescott, Kao, Lederer, & Boyman, 2019). As such, mitochondria must operate under a range of physiological conditions including transient changes in energy demand, oxidative stress, and moderate calcium overload. For example, in highly metabolic organs such as heart, brain and kidney, their response to these conditions is crucial for cell survival (Fridolfsson et al., 2012). However, in pathological conditions, such as during an ischemia/reperfusion event, mitochondria undergo a phenomenon known as the mitochondrial permeability transition (MPT). MPT is a gateway mechanism of cell death and involves the opening of a non-selective pore that allows small molecules and metabolites up to 1.5 kDa in size to (Du et al., 2008) freely diffuse across the inner mitochondrial membrane (Bernardi, 1999). When the pore is open, the membrane potential is dissipated, there is a loss of respiratory control, ATP is hydrolyzed, and osmotic swelling occurs (Halestrap & Pasdois, 2009). The swelling causes inner membrane unfolding, outer membrane rupture, and eventually release of apoptogenic molecules, including cytochrome c (cyt. c) that ends in cell death.

While the consequences of MPT are well appreciated, the molecular composition of the pore is currently unknown. The MPT phenomenon was first observed nearly seven decades ago when early studies in the mid 1950's to early 1960's demonstrated massive mitochondrial swelling under certain conditions (Chappell & Crofts, 1965; Hackenbrock & Caplan, 1969; F. E. Hunter, Jr. et al., 1964; Lehninger & Remmert, 1959; Raaflaub, 1953). These conditions involved calcium overload, high inorganic phosphate concentrations, fatty acids, oxidative stress, and adenine nucleotide pool depletion. Interestingly, acidosis, adenine nucleotides, divalent cations (e.g., Mg<sup>2+</sup>, Mn<sup>2+</sup>, Ba<sup>2+</sup> and Zn<sup>2+</sup>), and some metabolic cofactors (Bonsi et al., 2006) prevent

55 pore opening. In the late 1970's, Haworth and Hunter introduced the term 'permeability transition' and  
56 highlighted two important points: 1) pore opening is triggered by calcium, and 2) it is closed when calcium is  
57 removed from the environment (D. R. Hunter & Haworth, 1979). Their results were later confirmed by  
58 Crompton et al. (Crompton, Ellinger, & Costi, 1988) who further proposed that the pore may have a protein  
59 identity with some physiological role (Bernardi, 1999; Halestrap & Pasdois, 2009; D. R. Hunter & Haworth,  
60 1979; D. R. Hunter, Haworth, & Southard, 1976). Soon after, other pioneering studies demonstrated that this  
61 phenomenon was involved in many pathophysiological diseases and conditions such as neurological  
62 disorders, aging, response to toxins, cancer, muscular dystrophy, and ischemia-reperfusion injury  
63 (Fridolfsson et al., 2012; Jadiya et al., 2019; Lim et al., 2002; Marchi et al., 2013; Millay et al., 2008). Despite  
64 the well-known effects of calcium overload on mitochondrial function, the specific details remain a mystery.

65  
66 As of now, the current dogma of mitochondrial calcium overload is that mitochondrial dysfunction arises from  
67 the opening of a calcium-dependent, free radical sensitized, and proteinaceous molecular pore whose  
68 molecular identity thus far remains elusive. Unfortunately, efforts to identify the gene products responsible  
69 have been a rollercoaster ride of misleading discoveries and dashed hopes (Baines & Gutierrez-Aguilar,  
70 2018; Carroll, He, Ding, Fearnley, & Walker, 2019; Chinopoulos, 2018). Instead of focusing on the pore, we  
71 sought to investigate the consequence of excessive calcium overload on a population of isolated  
72 mitochondria by analyzing cryo-electron microscopy (cryo-EM) time-course data. This powerful imaging  
73 technique was coupled with high-resolution respirometry and spectrofluorimetry to structurally analyze the  
74 effect of calcium overload on mitochondrial function. We identified a novel mechanism that links calcium  
75 phosphate granule formation to cristae structural changes, inner membrane fragmentation, and ultimately  
76 mitochondrial permeabilization. This mechanism is not mutually exclusive with the current dogma as it  
77 integrates many past findings in a concise, overarching theoretical framework. However, our new data add  
78 exciting therapeutic targets for mitochondrial-protective therapies.

## 81 **Methods**

82  
83 **Ethical Approval.** This work conformed to the National Institutes of Health's Guide for the Care and Use of  
84 Laboratory Animals and was approved by Michigan State University's Institutional Animal Care and Use  
85 Committee.

86  
87 **Mitochondria Isolation and Protein Quantification.** Cardiac mitochondria were isolated from guinea pig  
88 hearts using differential centrifugation as described in Wollenman et al. (Wollenman, Vander Ploeg, Miller,  
89 Zhang, & Bazil, 2017) Briefly, Hartley albino guinea pigs weighing 350 – 450 g (4 – 6 weeks) were injected  
90 with heparin (500 units/ml) into the intraperitoneal cavity to prevent blood clotting during the cardiac  
91 mitochondrial isolation. Before heart removal, the animals were deeply anesthetized with 4 – 5 % isoflurane.  
92 Prior to decapitation by guillotine, a noxious stimulus (paw pinch and eyelid reflex) confirmed the animals  
93 were fully sedated. After decapitation, a thoracotomy was performed. The heart was then perfused with cold  
94 cardioplegia solution and homogenized as described previously (Wollenman et al., 2017). Mitochondrial  
95 protein content was quantified using the BIO-RAD Bovine Serum Albumin (BSA) Standard Set Kit and the  
96 BCA assay. The mitochondrial suspension was diluted to a working concentration of 40 mg/ml and kept on  
97 ice for the duration of the experiment (4 – 8 hours). Substrate stock solutions were neutralized to pH 7.0.

98  
99 **Mitochondrial Quality Control.** The mitochondrial quality was determined using an Oxygraph 2k (Oroboros  
100 Instruments Corp., Innsbruck, Austria) under constant stirring. The O2k chambers were loaded with 2 mL  
101 respiratory buffer containing 130 mM KCl, 5 mM K<sub>2</sub>HPO<sub>4</sub>, 20 mM MOPS, and 1 mM MgCl<sub>2</sub>, 1 mM EGTA, 0.1  
102 % (w/v) BSA at a pH of 7.1 and 37 °C. All subsequent experiments were done using this buffer and  
103 temperature. At 0 mins, 5 mM sodium pyruvate and 1 mM L-malate were added followed by 0.1 mg/ml  
104 mitochondria. Here we defined leak state as the rate of oxygen consumption by mitochondria only in the  
105 presence of substrates. At 5 mins a bolus of ADP (500 μM) was added to induce maximal ADP-stimulated  
106 respiration. Quality was assessed by computing the respiratory control ratio (maximal ADP-stimulated rate  
107 divided by the leak rate). Only mitochondria with an RCR value greater than or equal to 16 were used in the  
108 experiments.

109  
110 **Calcium Contamination and Buffer Calcium Measurements.** The amount of contaminating calcium  
111 present in the respiratory buffer was  $4.0 \mu\text{M} \pm 0.43 \mu\text{M}$  which comes from reagent impurities (Wollenman et  
112 al., 2017). This was measured using a perfectION™ calcium selective electrode (Mettler Toledo, Columbus,  
113 OH). Results were further confirmed using  $1 \mu\text{M}$  calcium fluorescent indicator calcium green 5N (503 nm  
114 excitation and 531 nm emission) using an Olis® DM245 spectrofluorimeter (Olis, Inc., Bogart, GA, USA).

115  
116 **Calcium Effects on Respiration and Oxidative Phosphorylation.** Calcium effects on mitochondrial leak  
117 and ADP-stimulated respiration were determined by quantifying changes in leak and ADP-stimulated  
118 respiration rates after a calcium challenge in the presence or absence of cyclosporin A (CsA). At 0 mins, 5  
119 mM sodium pyruvate, 1 mM L-malate,  $\pm 1 \mu\text{M}$  CsA, 0.1 mg/ml mitochondria were injected into each 2 mL  
120 chamber containing respiratory buffer. At 5 mins, a calcium bolus of either 75 or 100  $\mu\text{M}$  calcium chloride was  
121 injected. At 10 mins, 500  $\mu\text{M}$  ADP was added induce maximal ADP-stimulated respiration.

122  
123 **Mitochondrial Swelling Assay.** Mitochondrial swelling was quantified by measuring absorbance at 540 nm  
124 using an Olis® DM245 spectrofluorimeter with a dual-beam absorbance module. At 0 mins, 5 mM pyruvate  
125 and 1 mM L-malate was added to a polystyrene cuvette with respiration buffer containing  $\pm 1 \mu\text{M}$  CsA  
126 followed by the addition of 0.1 mg/ml mitochondria. At 5 mins, a 75 or 100  $\mu\text{M}$  calcium chloride bolus was  
127 added and the absorbance was recorded for a total of 15 mins. The minimum absorbance signal was  
128 determined by adding the uncoupler FCCP ( $1 \mu\text{M}$ ) and the channel forming peptide Alamethicin (10  $\mu\text{g}/\text{mg}$ ).  
129 To normalize the raw traces, we used the minimum absorbance value followed by the absorbance just before  
130 the addition of a calcium bolus.

131 **Calcium Uptake Dynamics.** Calcium uptake dynamics were quantified using the fluorescent dye, calcium  
132 green 5N (CaGr5N). Fluorescence was measured using an Olis® DM245 spectrofluorimeter. The dye was  
133 excited at 506 nm and the emission recorded at 531 nm. To minimize variability in dye concentration,  $1 \mu\text{M}$   
134 CaGr5N was added to 50 mL stocks of respiration buffer as opposed to adding small volumes to the 2 mL  
135 assay volume. At 0 mins,  $\pm 1 \mu\text{M}$  CsA, 5 mM sodium pyruvate and 1 mM L-malate, and 0.1 mg/ml  
136 mitochondria were added to a polystyrene cuvette. At 5 mins, a bolus of either 75 or 100  $\mu\text{M}$  calcium chloride  
137 was added and the fluorescence was recorded for 15 mins.

138  
139 **Cryo-EM Sample Vitrification and Imaging.** Isolated mitochondria were suspended at a concentration of  
140 0.1 mg/ml in 2 mL respiration buffer with 5 mM sodium pyruvate and 1 mM L-malate. At the collection times  
141 indicated, 5  $\mu\text{L}$  samples were pipetted from the mitochondrial suspension and deposited on Quantifoil R2/2  
142 Holey Carbon grids that had been plasma-cleaned for 20 seconds using a Fischione Instruments model 1020  
143 plasma cleaner. Grids were blotted to thin the water layer, and subsequently plunged into liquid ethane at  
144 room temperature using a manual plunge-freezing device (Michigan State University Physics Machine Shop).  
145 Grids were then transferred and stored in liquid nitrogen until imaging. Data for the 75  $\mu\text{M}$  calcium chloride  
146 experiments were collected in the cryo-EM facility at the University of Pittsburgh School of Medicine using an  
147 FEI Polara G2 cryo-electron microscope with a field emission gun operating at 300 kV at nominal  
148 magnification of 9,400x with a post-column magnification of 1.4x to obtain a  $\sim 12 - 10 \text{ \AA}/\text{pixel}$  resolution.  
149 Images were recorded on an FEI Falcon 3 direct electron-detecting camera. Data for the 100  $\mu\text{M}$  calcium  
150 chloride experiments were collected in the cryo-EM facility at the University of Pittsburgh School of Medicine  
151 using an FEI TF20 cryo-electron microscope with a field emission gun operating at 200 kV. The images were  
152 collected using a nominal magnification in the range of 5,000x on a TVIPS XF416 CMOS camera with a post-  
153 column magnification of 1.4x to obtain a  $22 \text{ \AA}/\text{pixel}$  resolution. At these magnifications, the electron dose ( $e^-$   
154  $/\text{\AA}^2$ ) is low enough to avoid significant sample destruction.

155  
156 **Calcium Phosphate Granules, Posner's Clusters, and Mitochondrial Structure Quantification.** The  
157 program EMAN2 (Tang et al., 2007) was used to quantify the total number of granules for each  
158 mitochondrion under each condition from TEM images. A total of 1345 individual mitochondrial images were  
159 acquired in the presence and absence of CsA for two calcium treatments. For the 75  $\mu\text{M}$  calcium chloride  
160 treatment, there were 235 images of control mitochondria and 645 images of CsA-treated mitochondria. For  
161 the 100  $\mu\text{M}$  calcium chloride treatment, there were 231 images of control mitochondria and 234 images for

162 CsA-treated mitochondria. Mitochondrial and phosphate granule diameters were computed from three  
163 averages of two diagonal and one horizontal diameter measurement. Pixel resolution was converted to  
164 nanometers based on the magnification level. The fractional area that the calcium phosphate granules  
165 occupy per mitochondrion was calculated by multiplying the number of granules within a mitochondrion times  
166 the sum of all the granule areas divided by the area of the mitochondrion ( $N_{\text{granules}} * A_{\text{granules}} / A_{\text{mito}}$ ). The calcium  
167 phosphate nanoclusters ( $n = 227$ ) were determined by measuring the electron-dense regions located within  
168 the granules using ImageJ (NIH, Bethesda, MD, USA).

170 **Statistics.** The Shapiro-Wilks test was used to confirm data normality. All data were analyzed and plotted  
171 using MATLAB 2019a (Mathworks, Inc., Natick, MA, USA). The data in figures 1 – 3 ( $n = 3 - 4$ ) and stats  
172 presented for the calcium phosphate nanoclusters are presented as mean  $\pm$  standard deviation.  
173 Mitochondrial images with calcium phosphate granules were only included for the histogram analysis ( $n$  value  
174 in the figures). An unpaired Student's  $t$  test was used to compare the CsA treatment with the control group.  
175 An  $n$ -way ANOVA was run to determine significant effects between treatments at various calcium loads and  
176 different time-points. A  $p$  value  $< 0.05$  was assumed to be statistically significant.

178 **Reagents.** All reagents were purchased from Sigma-Aldrich unless otherwise stated. Calcium Green<sup>TM</sup>-5N  
179 hexapotassium salt was purchased from Thermo Fisher Scientific.

## 182 Results and Discussion

183  
184 **Respiratory inhibition by calcium overload is reversible in low-to-moderate calcium overload.** While  
185 mitochondrial calcium concentrations lower than 100 nmol calcium/mg mitochondria supports ATP production  
186 (Bazil, Blomeyer, Pradhan, Camara, & Dash, 2013; Glancy et al., 2013; Wescott et al., 2019), levels above  
187 500 nmol/mg mitochondria depress oxidative phosphorylation (Brustovetsky et al., 2003; Malyala, Zhang,  
188 Strubbe, & Bazil, 2019; Pandya, Nukala, & Sullivan, 2013; Territo, Mootha, French, & Balaban, 2000). In one  
189 of these studies, it was proposed that calcium phosphate precipitates form in the mitochondrial matrix at high  
190 calcium loads and reduce ATP production rates by either impeding metabolite transport and diffusion or  
191 destabilizing cristae, the functional units of mitochondria. However, the lasting effects of significant calcium  
192 accumulation were not explored in either of these studies. To test this, we monitored mitochondrial respiration  
193 rates following the addition of the calcium chelator EGTA under various calcium boluses in the range of 0 to  
194 500 nmol/mg as shown in Figure 1.

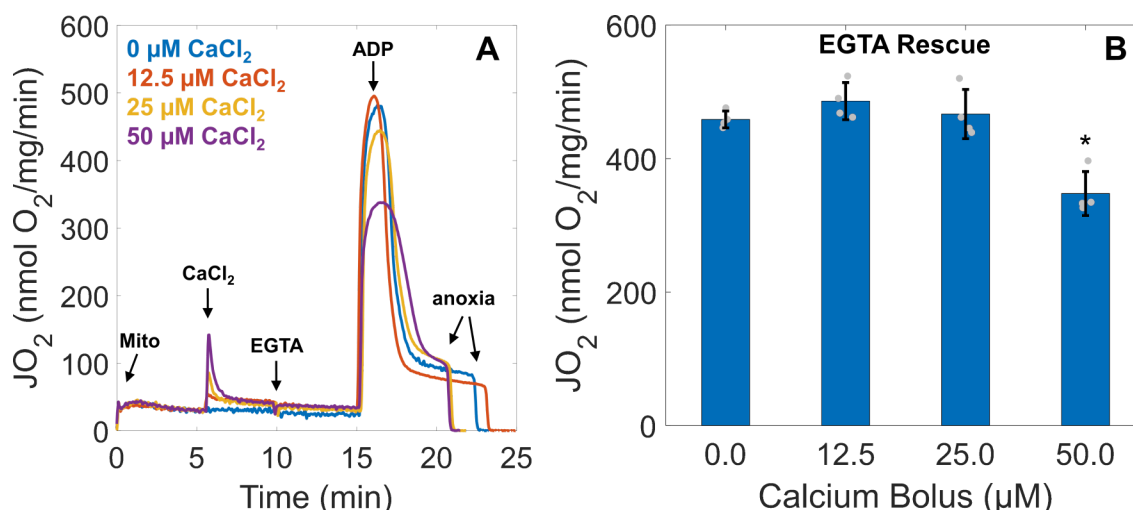

**Figure 1. EGTA rescues mitochondrial function at low-to-moderate calcium loads but not high loads.** A) Representative traces of ADP-stimulated respiration from calcium loaded mitochondria following the addition of EGTA. Mitochondria (0.1 mg/ml) were energized with 5 mM sodium pyruvate and 1 mM L-malate and exposed to various calcium boluses (0, 12.5, 25, and 50  $\mu\text{M}$ ). Five mins after calcium uptake, 1 mM EGTA was added to chelate all calcium in the system. Following an additional 5 mins, a bolus of 500  $\mu\text{M}$  ADP was added to induce maximal ADP-stimulated respiration. B) ADP-stimulated mitochondrial respiration is recovered after EGTA addition for all but the 50  $\mu\text{M}$  calcium bolus. Data are presented as mean  $\pm$  standard deviation for a sample size of  $n = 4$ . Statistical comparisons are made with respect to 0  $\mu\text{M}$  calcium. \* represents a  $p$  value  $< 0.01$ .



195 The results in Figure 1 show that the inhibitory effect of calcium overload is reversible for all but high calcium  
196 loads. As expected, the respiratory rates – the amount of oxygen consumed per mitochondrial content at a  
197 given time – before calcium addition were equal across conditions. After a transient increase in respiration  
198 due to calcium uptake, respiration remains elevated because of the activation of calcium-sensitive matrix  
199 dehydrogenases and sodium/calcium cycling. When 1 mM EGTA was added to chelate buffer calcium, the  
200 ADP-driven respiratory rates were similar across all conditions except for the highest dose tested. These  
201 results suggest that when calcium overload exceeds a certain threshold, mitochondrial oxidative  
202 phosphorylation is irreversibly inhibited. This effect does not involve mitochondrial calpains (Malyala et al.,  
203 2019) and may involve some sort of structural change that lowers ATP production rates. Thus, the effect of  
204 calcium overload lies on a spectrum whereby higher levels of calcium result in detrimental changes in  
205 mitochondrial bioenergetic pathways.

206  
207 **CsA preserves the mitochondrial function under high calcium loads.** We then measured mitochondrial  
208 respiratory rates during excessive calcium overload by adding a 75  $\mu\text{M}$  or 100  $\mu\text{M}$  calcium bolus in the  
209 presence or absence of CsA, a known PTP inhibitor (Figure 2A and 2B). In agreement with results from  
210 Figure 1, increasing the extent of calcium overload impairs oxidative metabolism. However, the depressive  
211 effects of calcium on ADP-stimulated respiration is much more severe at these higher doses. The respiratory  
212 rate after ADP addition drops below 50 nmol  $\text{O}_2/\text{mg}/\text{min}$  after the 75  $\mu\text{M}$   $\text{CaCl}_2$  bolus and drops below 20  
213 nmol  $\text{O}_2/\text{mg}/\text{min}$  for the 100  $\mu\text{M}$   $\text{CaCl}_2$  bolus. When CsA was present, this calcium-dependent inhibitory effect  
214 is partially mitigated with the rate reaching nearly 320 nmol  $\text{O}_2/\text{mg}/\text{min}$  after the 75  $\mu\text{M}$  bolus and 280 nmol  
215  $\text{O}_2/\text{mg}/\text{min}$  for the 100  $\mu\text{M}$  bolus. Therefore, as others have found, CsA partially preserves mitochondrial  
216 function in the face of overwhelming calcium overload (Baines & Gutierrez-Aguilar, 2018; Bonora et al., 2016;  
217 De Marchi, Bonora, Giorgi, & Pinton, 2014; Fournier, Ducet, & Crevat, 1987; McGee & Baines, 2012). This  
218 effect is typically attributed to the ability of CsA to inhibit PTP opening; however, our structural data shown in  
219 the following sections suggest the existence of a novel protective effect of CsA.

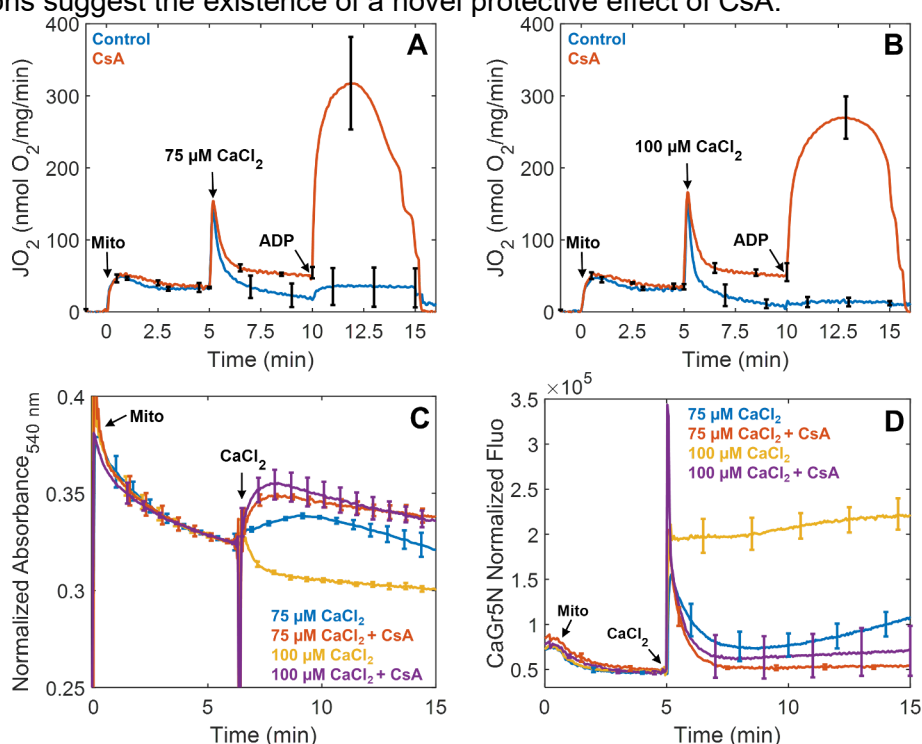

**Figure 2. CsA preserves ADP-stimulated respiration, increase the absorbance, and enables robust calcium uptake in a calcium dependent manner.** A and B) The addition of 1  $\mu\text{M}$  CsA prevented a near-total collapse of ADP-stimulated respiration after a bolus of 75 or 100  $\mu\text{M}$  calcium chloride. Mitochondria were energized as described in Figure 1. C) Mitochondrial swelling was monitored in parallel by quantifying absorbance at 540 nm. Large amplitude swelling was only observed in the 100  $\mu\text{M}$  calcium bolus group when CsA was absent. D) Experimental conditions for calcium uptake were similar except that these experiments were performed in a cuvette open to atmosphere and tracked using the fluorescent probe CaGr5N (1  $\mu\text{M}$ ). In the absence of CsA, both calcium boluses were not completely taken up by the mitochondria, while in some instances, mitochondria can uptake calcium followed by release as shown after the addition of a 75  $\mu\text{M}$  calcium chloride bolus. In contrast, CsA enables near-complete calcium uptake of either bolus. Data are presented as mean  $\pm$  standard deviation for a sample size of  $n = 3 - 4$ .

In addition to the respirometry studies, mitochondrial absorbance data obtained in parallel (Figure 2C) shows that only the 100  $\mu\text{M}$  calcium chloride bolus elicited large amplitude swelling, a classic indicator of mitochondrial permeability transition (Di Lisa, Menabò, Canton, Barile, & Bernardi, 2001). In contrast, the addition of a 75  $\mu\text{M}$  calcium chloride bolus induced an increase in absorbance due to the formation of calcium phosphate granules scattering light at this wavelength (Chalmers & Nicholls, 2003). The gradual decrease in absorbance that follows is attributed to mitochondria fragmenting over time in response to the calcium insult. For both CsA-treated groups, the calcium-dependent increase in absorbance was sustained followed by a much slower decrease. However, the decrease in signal is not due to mitochondrial fragmentation but rather due to the inner membrane reorganization and matrix expansion (Beavis, Brannan, & Garlid, 1985; Garlid & Beavis, 1985). This phenomenon is discussed in latter sections of this report when classifying CsA-treated mitochondria. These results are similar to findings from a recent study that looked at the effects of the mitochondria-targeting peptide SS-31 on reducing infarct size of reperfused ischemic hearts (Brown et al., 2014). In that study, the changes in absorbance after CsA treatment following addition of calcium chloride are very similar to our results.

Our interpretation of the absorbance data is supported by our calcium uptake data shown in Figure 2D. These data also demonstrate the profound beneficial effects of CsA on mitochondrial calcium sequestration. When CsA was absent, mitochondria were not able to maintain calcium homeostasis and calcium was released into the buffer. For the 75  $\mu\text{M}$  calcium chloride challenge, this release was gradual and suggests there is a snowball-like effect in which mitochondria with lower calcium tolerances release their calcium loads and force other mitochondria to take up even more calcium (Bernardi, 1992, 1999; Petronilli, Cola, Massari, Colonna, & Bernardi, 1993). This results in additional mitochondria losing their ability to retain calcium, and the process repeats until the entire mitochondrial population is compromised. In contrast, mitochondria were not able to effectively take up and store the 100  $\mu\text{M}$  calcium bolus at all when CsA was absent. This level of calcium overload is sufficient to rapidly compromise the entire population in short order.

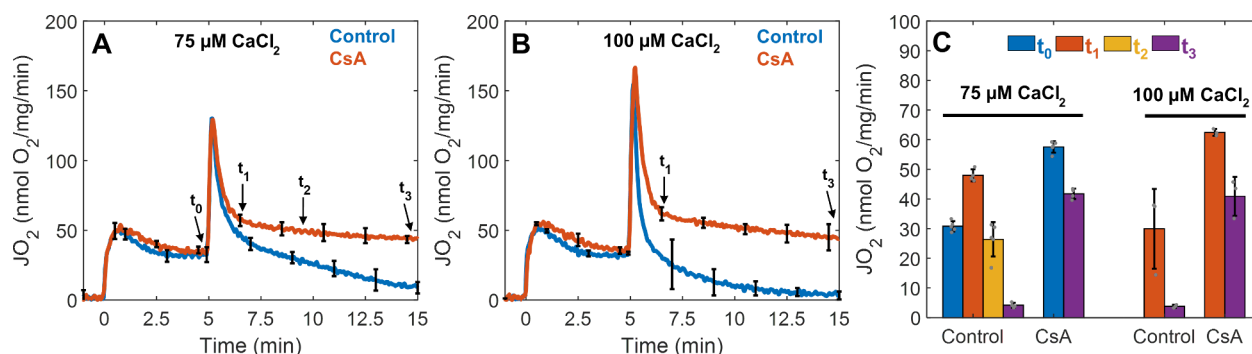

**Figure 3. Cryo-EM sample collection protocol and time-points.** A) For the 75  $\mu\text{M}$  calcium chloride bolus, 5  $\mu\text{l}$  of the mitochondrial suspension were collected and deposited on the Quantifoil holey-carbon grid at 5 mins just before calcium addition (t<sub>0</sub>), approximately 1.5 mins after calcium addition (t<sub>1</sub>), 4 mins after calcium addition (t<sub>2</sub>), and 10 mins after calcium addition (t<sub>3</sub>). B) For the 100  $\mu\text{M}$  calcium chloride bolus, the mitochondrial suspension was sampled at t<sub>1</sub> and t<sub>3</sub>. In all conditions, mitochondria (0.1 mg/ml) were energized with 5 mM sodium pyruvate with 1 mM L-malate. C) The effect of calcium in the presence or absence of CsA was quantified for each time-point. In the absence of CsA, mitochondrial respiration decreases dramatically as a function of time and the effect is exacerbated at greater calcium loads. In the presence of CsA, mitochondrial respiration was maintained. Data are presented as mean  $\pm$  standard deviation for n = 3 – 5 biological replicates.

**Elucidating the effects on calcium overload on mitochondrial ultrastructure.** To capture mitochondria undergoing MPT during calcium overload, we used the sampling scheme shown in Figure 3. These samples were drawn from a cuvette of isolated mitochondria at the indicated time points and subsequently vitrified in liquid ethane and imaged using cryo-EM. A total of 1345 cryo-EM images were analyzed and organized by sample time-point; before adding calcium (t<sub>0</sub>) and 1.5 mins (t<sub>1</sub>), 4 mins (t<sub>2</sub>), and 10 mins (t<sub>3</sub>) after adding a calcium bolus. We found that many mitochondria shared certain features at each time point and grouped them into 5 stages based on morphology and structure. Each stage represents the transition leading towards complete fragmentation and loss of function in the context of calcium phosphate granules abundance, growth, outer membrane rupture, cristae integrity, and inner membrane fragmentation (Table 1). An example of this stage classification is shown in Figure 4A. These panels represent the typical process induced by a 75  $\mu\text{M}$  bolus of calcium in a population of isolated mitochondria.

257

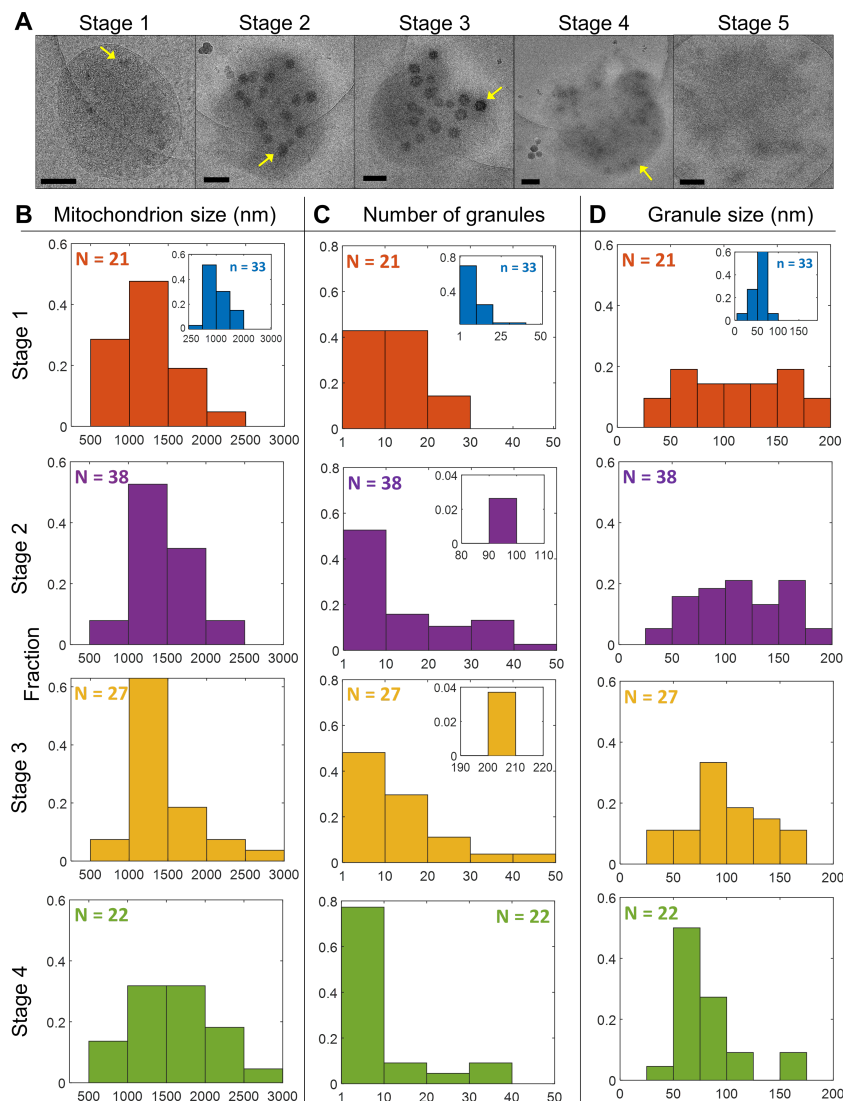

**Figure 4. Calcium induces the formation of calcium phosphate granules, outer membrane rupture, and inner membrane evisceration.** A) Representative images of mitochondria from stages 1 – 5 show that calcium induces inner membrane evisceration and outer membrane rupture. The lighter circle is the hole of the Quantifoil carbon grid. Mitochondria typically adhere to the carbon support film that is made hydrophilic after plasma treatment, so they are often either entirely on the carbon or half-on and half-off as shown in these images. The images from stage 2 through 4 contain ice contamination. These ice crystals appear as dark spots with a white fringe or halo outside and below or to the side of the mitochondria. These are easily distinguishable from calcium phosphate granules located in the mitochondrial matrix. Scale bars are 250 nm. The insets for the Stage 1 histograms (B-D) are histograms calculated from images collected before the addition of a 75  $\mu$ M calcium bolus. The presence of these granules is due to  $\sim$ 4  $\mu$ M calcium contamination in the respiration buffer. The addition of a 75  $\mu$ M calcium bolus leads to the formation of much larger and more abundant calcium phosphate granules of various sizes. B-D) The mitochondrial sizes and the calcium phosphate granules number and sizes per mitochondrion were further quantified. The mitochondrial size does not change significantly between stages. However, the granule abundance decreases by stage 4. Granules dissolving due to inner membrane fragmentation and loss of membrane potential cause this. The number of images analyzed for each stage is given by n. Note, no histograms for stage 5 are given as this stage consists of completely fragmented mitochondria with no calcium phosphate granules. The data from histograms were obtained from only mitochondria containing calcium phosphate granules. Arrows point to calcium phosphate granules.

258

**Table 1. Mitochondrial Stages of Permeabilization Inferred from Structural Data**

| Stage | Characterization                                                                                   |
|-------|----------------------------------------------------------------------------------------------------|
| 1     | Rounded mitochondria with intact IMM/OMM with small or no granules present (n=33)                  |
| 2     | Large granules are present, initial localized OMM rupture, altered OMM morphology (n=59)           |
| 3     | OMM partially or completely lost, beginning of IMM evisceration, granules begin to dissolve (n=48) |
| 4     | Significant IMM fragmentation, granules mostly dissolved (n=69)                                    |
| 5     | Complete IMM fragmentation, only membrane fragments present, granules completely dissolved (n=65)  |

259

OMM = outer mitochondrial membrane, IMM = inner mitochondrial membrane, n is the number of images collected with a mitochondrion in that stage

260 Mitochondria in stage 1 have intact inner and outer membranes and are typically round (Figure 4A and S1).  
261 Cristae structures in this set of images are hard to distinguish; however, some are identifiable. Before the  
262 addition of a calcium bolus mitochondria are smaller and their inner and outer membranes remain intact as  
263 shown by the insets in Figure 4B – 4D. The number of calcium phosphate granules is relatively low with sizes  
264 averaging less than 100 nm in size. After the addition of 75  $\mu$ M calcium chloride, mitochondria begin to  
265 fragment and lose bioenergetic competency. The beginning of this process is characterized by stage 2  
266 (Figures 4 and S2). In this stage, regions of localized outer membrane rupture are observed and are always  
267 accompanied by the appearance of calcium phosphate granules. While the size of granules within a  
268 mitochondrion does not vary significantly, differences between mitochondria are common and noticeable  
269 (Figure S3). During the transition from stage 2 to stage 3, outer membrane definition is lost and the inner  
270 membrane is released. The inner membrane also begins to fragment in this stage. In some instances,  
271 calcium phosphate granules are still present indicating that the inner membrane is still energized. However,  
272 there are also images of this stage showing granules in the middle of dissolution (Figure S4), so this stage is  
273 when depolarization begins. Unexpectedly, the granules appear to dissolve from the inside out. In stage 4,  
274 the outer membrane is almost entirely gone, and inner membrane is extensively fragmented. Stage 5 is  
275 characterized by the complete fragmentation of the mitochondrial inner membrane and is the dominant stage  
276 at the 15 min time point. In this stage, mitochondria are deenergized and contain no calcium phosphate  
277 granules.

278  
279 Interestingly, there were no large differences in mitochondrion sizes between the time points (ranging 500 –  
280 3000 nm with mean values  $\sim$ 1400 nm), but there were some clear differences in the size and number of  
281 granules (Figure 4B – 4D). As mitochondria transition from stage 1 to stage 3, the increase in absorbance  
282 shown in Figure 2C is caused by the increases in numbers and sizes of calcium phosphate granules. In fact,  
283 the number of calcium phosphate complexes per mitochondrion reaches a maximum by stage 3 and  
284 decreased in the following stage as shown in Figure 4C. The decreased in size and abundance by stage 4 is  
285 due to more complete mitochondrial permeabilization and fragmentation. Hence, for the first time to our  
286 knowledge, the MPT phenomenon now has direct visual confirmation of the processes proposed to occur.  
287 However, our results elucidate a mechanism that pinpoints cristae remodeling and inner membrane  
288 fragmentation as the key determinant of mitochondrial dysfunction as discussed further below.



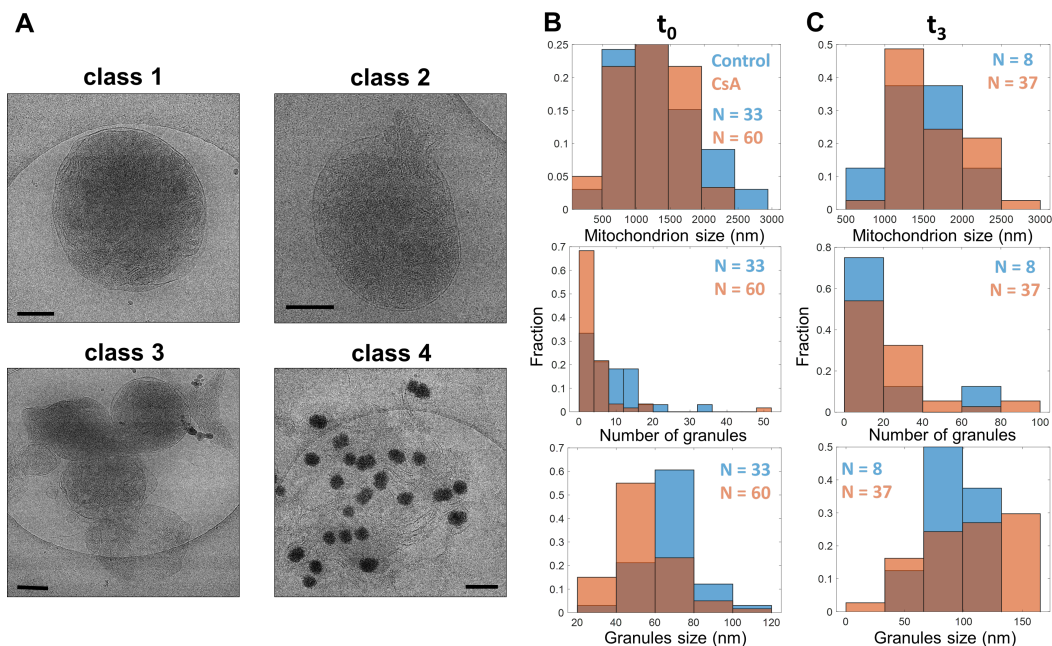

**Figure 5. CsA disrupts the outer membrane morphology, causes release of the inner membrane, tends to form mitochondrial clusters, and enhances the number and size of calcium phosphate granules per mitochondrion.**

Representative images before the addition of a 75  $\mu\text{M}$  calcium bolus ( $t_0$ ) in the presence of 1  $\mu\text{M}$  CsA. Mitochondria were energized with 5 mM sodium pyruvate and 1 mM L-malate. A) CsA induced morphological changes to mitochondria that can be grouped into 4 classes as described in Table 2. B) The mitochondrial size, calcium phosphate granules size and number per mitochondrion were quantified for each time-point ( $t_0 - t_3$ ) before and after the addition of a 75  $\mu\text{M}$  calcium bolus in the presence or absence of CsA. B) There are no differences in the mitochondrial size of control to CsA-treated mitochondria before the addition of calcium. C) After the calcium addition, the number and size of the granules increased in CsA-treated mitochondria were much larger than in the control mitochondria. Scale bars are 250 nm. n represents the number of images analyzed by the time point for control and CsA treated conditions.

**CsA preserves the inner membrane, promotes the formation of granules of greater size, and increases the abundance.** Next, we repeated the calcium overload imaging experiments in the presence of CsA to understand how mitochondrial respiration and calcium handling were preserved from an ultrastructural perspective (Figure 5 and S5). Similar to control mitochondria, CsA-treated samples were grouped into 4 classes based on morphology (Table 2). However, the classes are not related to a sequence of events like the stages, rather they are descriptive. Many of the images showed normal looking mitochondria with well-defined inner and outer membranes. These are class 1 mitochondria. Some of these mitochondria contained granules caused by uptake of low levels of contaminant calcium. In addition, some mitochondria had a condensed inner membrane that was sometimes localized to one side of the mitochondrion. These electron-dense regions are presumably area of high cristae density. Interesting, some images showed mitochondria with the outer membrane ruptured with the inner membrane partially or more completely ejected from the mitochondrion. These mitochondria are classified as class 2 mitochondria. In other images, mitochondria were clustered together and are defined as class 3 mitochondria. Lastly, after the calcium treatment, images revealed mitochondria with no outer membrane, large calcium phosphate granules, and the inner membrane spread across the carbon grid. These mitochondria are classified as class 4 mitochondria. Because of morphological changes induced by CsA and calcium addition, the sizes of these mitochondria are larger than mitochondria in the other classes. In addition, mitochondria in this class had granules of heterogeneous sizes between but rarely within a single mitochondrion (Figure S6). Despite these radical changes in ultrastructure, the mitochondria remain functionally competent as shown in Figure 2. The best explanation for this observation is that the cristae junctions and inner membrane integrity is preserved by the CsA treatment.

**Table 2. Mitochondrial Classes of Inferred After CsA Treatment**

| Class | Characterization                                                                                  |
|-------|---------------------------------------------------------------------------------------------------|
| 1     | Normal looking mitochondria with defined OMM, condensed IMM, and with or without granules (n=215) |
| 2     | Inner mitochondrial membrane ejection (n=48)                                                      |
| 3     | Clustered mitochondria (n=81)                                                                     |
| 4     | IMM spread out but intact with granules present (n=219)                                           |

OMM = outer mitochondrial membrane, IMM = inner mitochondrial membrane, n is the number of images collected with a mitochondrion in that stage

312 After calcium addition, the abundance and size of granules per mitochondrion and the mitochondrion size  
 313 increased in the presence of CsA compared to the control group (Figure 5). Before the addition of calcium,  
 314 the average control mitochondrion size was  $1320 \pm 550$  nm, the average granule size of  $68 \pm 14$  nm, and the  
 315 average number of granules per mitochondrion was  $9.7 \pm 3.1$ . Whereas the average CsA-treated  
 316 mitochondrion size was  $1180 \pm 400$  nm, the average granule size was  $55 \pm 16$  nm, and the average number  
 317 of granules per mitochondrion was  $5.1 \pm 2.3$ . These results show that CsA does not influence any of these  
 318 parameters before the large calcium bolus was administered. However, after calcium addition, there are  
 319 noticeable differences between control and CsA-treated mitochondria. The mitochondrial size for control  
 320 mitochondria average  $1470 \pm 530$  nm with a granule size of  $90 \pm 22$  nm and abundance of  $18.0 \pm 4.3$  per  
 321 mitochondrion. Whereas CsA-treated mitochondria size average was  $1630 \pm 400$  nm with a granule size of  
 322  $102 \pm 36$  nm and abundance of  $26.0 \pm 5.1$  per mitochondrion. Of note, only a small number of control  
 323 mitochondria survived by the last time point (Figure 5C).

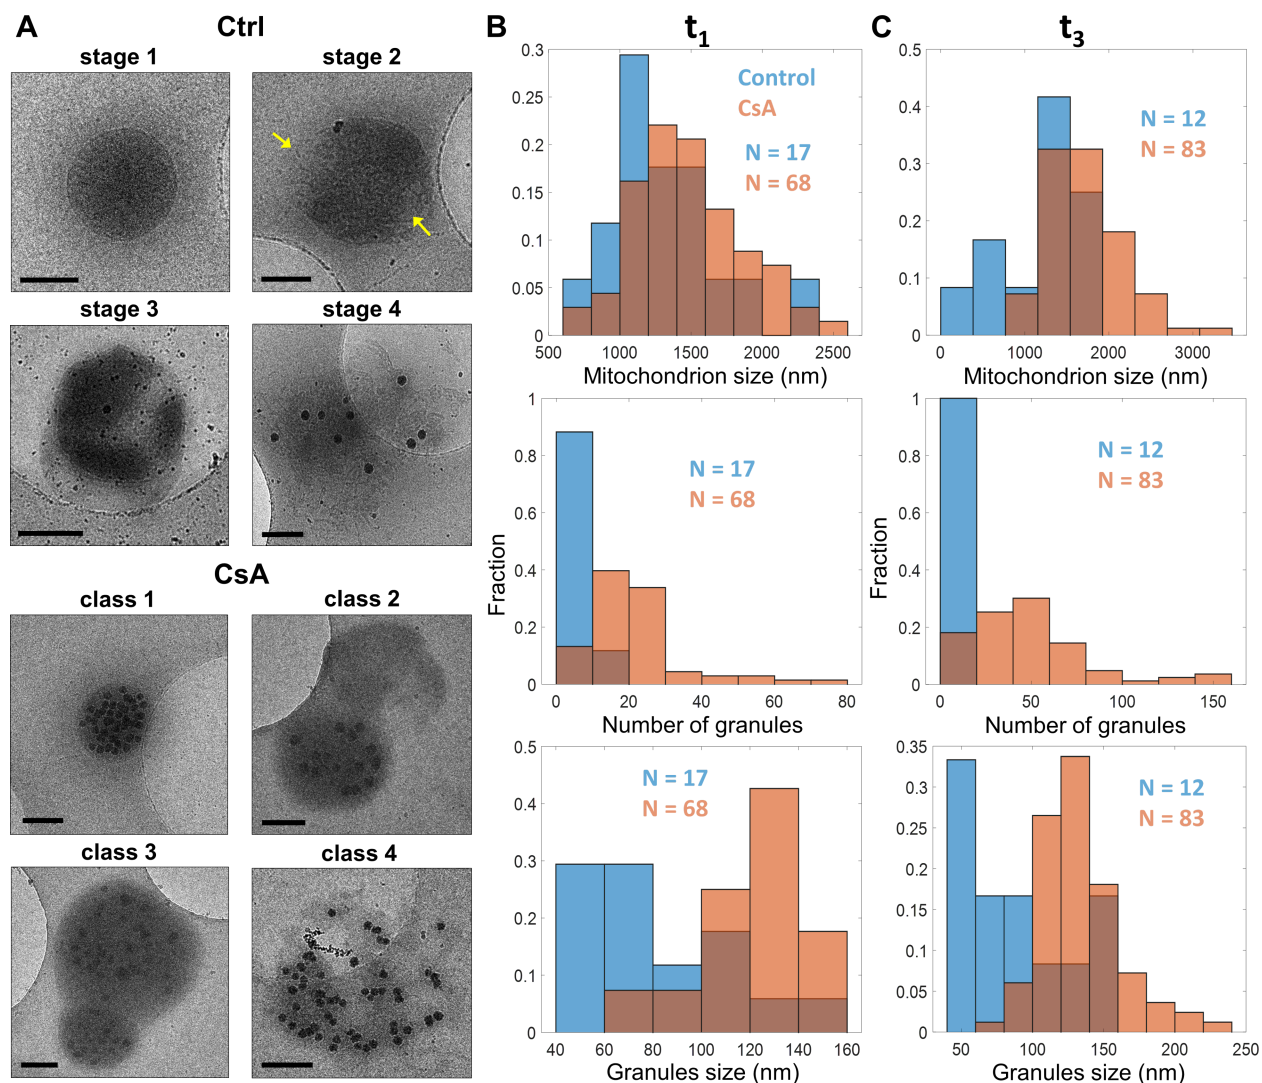

324 **Mitochondrial membrane fragmentation occurs more rapidly at greater calcium loads but is mitigated**  
325 **by CsA.** Seeking to understand the observed large amplitude swelling for the control group after the addition  
326 of a 100  $\mu\text{M}$  calcium chloride bolus, images of control mitochondria were collected after a 100  $\mu\text{M}$  calcium  
327 bolus addition. Most of the images displayed outer membrane rupture at multiple regions suggesting a rapid  
328 expansion of the inner membrane compared to the 75  $\mu\text{M}$  calcium bolus (Figures 6, S7 and S8). Thus, at this  
329 high of a calcium bolus, the morphological changes were caused by what appears to be *bona-fide*  
330 permeability transition pore opening. As expected, CsA prevented this rapid expansion and led to the  
331 formation of numerous and large calcium phosphate granules. Without CsA, the size and abundance of the  
332 granules were noticeably decreased (Figure 6B). While there were no differences in mitochondrion sizes  
333 between treatments shortly after calcium addition ( $1320 \pm 370$  nm vs  $1490 \pm 380$ ), the average control  
334 mitochondrial size decreased to  $1160 \pm 440$  nm in the last time point (Figure 6C). In contrast, the average  
335 CsA-treated mitochondrion size increased to  $1710 \pm 440$  nm. The average number of granules in control  
336 mitochondria as a function of time was reduced from  $9.6 \pm 3.1$  to  $6.6 \pm 2.6$ . The average size of these  
337 granules marginally increased from  $84 \pm 32$  to  $90 \pm 37$  nm. The average number of granules in CsA-treated  
338 mitochondria increased from  $46.1 \pm 6.8$  to  $107 \pm 10$  with average sizes increasing from  $121 \pm 21$  to  $132 \pm 28$   
339 nm. These values are greater compared to the values measured after a 75  $\mu\text{M}$  calcium bolus was given. This  
340 is consistent with CsA increasing calcium accumulation and preserving mitochondrial function even at these  
341 high calcium loads. However, the oxygen consumption rate after the 100  $\mu\text{M}$  calcium bolus was significantly  
342 lowered compared to the 75  $\mu\text{M}$  calcium bolus (Figure 2A and 2B). Hence, we conclude that calcium induces  
343 irreversible effects on mitochondrial function and CsA, although not entirely protective, delays complete loss  
344 of function and allows more calcium uptake.

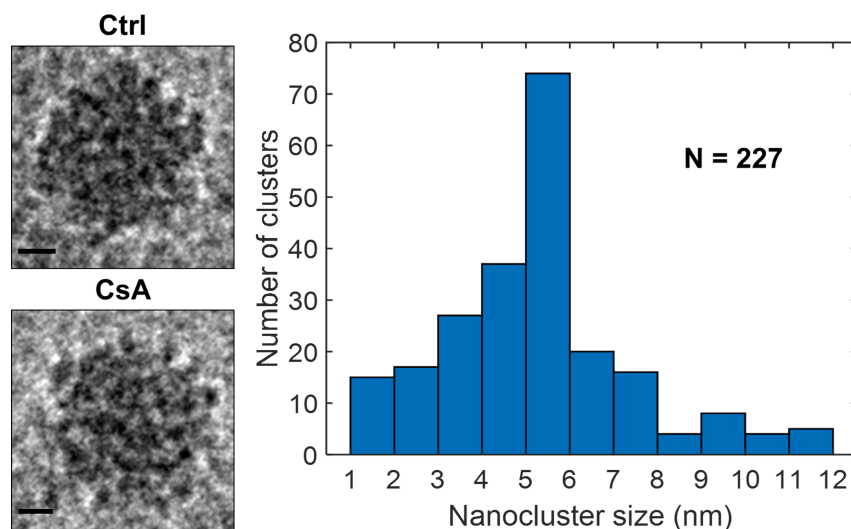

**Figure 7. Calcium phosphate granule structure.** Left) Representative images of calcium phosphate granules for each calcium condition in the presence or absence of CsA shows near identical structure. Right) Each granule consists of many individual electron-dense calcium phosphate nanoclusters with a diameter of  $5.3 \pm 2.1$  nm. Scale bars are 25 nm.

345 **Calcium phosphate granules are composed of smaller structural units.** Calcium phosphate complexes  
346 are considered the main component of the mitochondrial calcium sequestration system (Malyala et al., 2019;  
347 Nicholls & Chalmers, 2004; Wolf et al., 2017). Pioneering studies by Posner and others suggested that  
348 amorphous calcium phosphate consists of many smaller spherical elements with a chemical composition of  
349  $\text{Ca}_9(\text{PO}_4)_6$  (Eliaz & Metoki, 2017; Jiang, Pan, Chen, Xu, & Tang, 2015; Mancardi, 2017; Onuma, 1998). These  
350 elementary calcium phosphate units were named as Posner clusters with a diameter ranging from 0.7 to 1.0  
351 nm (Onuma, 1998). In the present study, we lack the image resolution to resolve individual Posner clusters.  
352 However, our data show that the calcium phosphate granules are composed of highly electron-dense regions  
353 that resemble Posner clusters stacked together forming a higher order granule structure as shown in Figure  
354 7. Our data also reveal that these structures are independent of CsA treatment or sampling time with the only  
355 major difference between clusters being their size. Assuming that these higher order granule structures are  
356 packed in a body-centered cubic lattice, the volume fraction of solid calcium phosphate is approximately 70%.  
357 Computing the total volume fraction of these granules by multiplying the volume of individual granules and  
358 their numbers per estimated mitochondrial volume (based on measured diameters and approximate



359 thickness of 300 nm) gives an average volume fraction of 0.025. The thickness is a constraint applied after  
360 thinning the water layer before vitrification. Then by assuming a Posner cluster volume of  $0.32 \text{ nm}^3$ , the  
361 average calcium load per mitochondrion is 796 nmol/mg. To convert from mitochondrial volume to  
362 mitochondrial mass, we used the estimate of  $6 \times 10^9$  mitochondria/mg reported in Beavis and Garlid (Beavis et  
363 al., 1985). This value, 796 nmol/mg, is strikingly similar to the expected value of 750 nmol/mg calculated from  
364 the calcium uptake data shown in Figure 2D. Thus, these images yield expected values of calcium uptake  
365 and show the overwhelming majority of calcium taken up by mitochondria is stored in these calcium  
366 phosphate granules.

367  
368 While the vast majority of the isolated mitochondria contained calcium phosphate granules following the  
369 calcium addition, a few did not. There are two possible explanations for this phenomenon; either this group of  
370 mitochondria is 1) de-energized preventing calcium uptake or 2) they lack mitochondrial calcium uniporters  
371 (MCU). Based on the following statistical arguments, the latter is a more likely explanation. Assuming there  
372 are 40 MCUs per mitochondrion (Wescott et al., 2019) with an estimated standard deviation of 20, the  
373 probability of randomly selecting a mitochondrion without an MCU channel is 2.3 %. This corresponds to 11  
374 mitochondria in our total set of 502 images. In agreement with this estimation, our data show that 17  
375 mitochondria do not possess granules after either calcium bolus was given which corresponds to 3.4 % of the  
376 number of mitochondria imaged. This percentage is independent of treatment with 3.5 % of control  
377 mitochondria and 3.6 % of CsA treated mitochondria without any calcium phosphate granules. These results  
378 also match the respirometry data given in Figure 2 whereby even after a large bolus of calcium chloride,  
379 some mitochondria are bioenergetically competent and synthesize ATP after the ADP bolus. Assuming that  
380 the boluses of calcium were sufficient to elicit MPT in the mitochondria with an MCU channel, the measured  
381 ADP-stimulated respiratory rate increase must be due to mitochondrial lacking an MCU. In line with this  
382 observation, the maximum ADP-stimulated respiratory rate for each calcium treatment relative to the  
383 maximum rate without calcium (as shown in Figure 1), is  $10.9 \% \pm 5.2$  and  $4.3 \% \pm 1.1$  for the  $75 \mu\text{M}$  and  $100$   
384  $\mu\text{M}$  calcium bolus, respectively. These values are strikingly close to the value estimated from the imaging  
385 data.

### 387 **A new sequence of events that leads to mitochondrial dysfunction.**

388 The current leading hypothesis of calcium-induced mitochondrial dysfunction involves the peptidyl-prolyl *cis-*  
389 *trans* isomerase, cyclophilin D (CypD), interacting with as yet to be identified inner membrane proteins to  
390 form the permeability transition pore (Baines & Gutierrez-Aguilar, 2018; Bernardi, Di Lisa, Fogolari, & Lippe,  
391 2015; Crompton et al., 1988; Kim et al., 2014; Porter & Beutner, 2018). When open, the pore results in  
392 sustained membrane depolarization, large amplitude swelling, and calcium release (Elmore, Qian, Grissom,  
393 & Lemasters, 2001; D. R. Hunter & Haworth, 1979), and loss of mitochondrial respiratory control. However,  
394 CsA can bind to CypD and sequester it so that its interaction with its target is prevented (De Marchi et al.,  
395 2014). However, CsA is not fully protective. It is believed that it only increases the calcium threshold required  
396 to open the pore. This idea is based on studies that show CsA increases the calcium retention capacity by  
397 nearly 3-fold (Chalmers & Nicholls, 2003). While an attractive hypothesis, this model has problems that are  
398 easier to explain using a different mechanism. As an alternative, we propose a novel mechanism of action  
399 whereby CsA enables robust calcium accumulation in the context of promoting calcium uptake and calcium  
400 phosphate granule formation. This mechanism involves the interaction between putative CsA-regulated  
401 proteins, and cristae structural proteins to preserve the inner membrane intactness. While the calcium  
402 phosphate granules may induce changes in morphology by mechanically disrupting membranes, it is  
403 plausible that free calcium interacts with proteins regulating inner membrane and cristae maintenance  
404 (namely the optic atrophic factor 1 and the mitochondrial contact site and cristae organizing system; known  
405 as OPA1 and MICOS) or additional regulators of this system. For instance, the stress-sensing overlapping  
406 activity with *m*-AAA protease 1 (OMA1) is a zinc metallopeptidase found in the inner mitochondrial membrane  
407 regulating mitochondrial dynamics through OPA1 processing (Consolato, Maltecca, Tulli, Sambri, & Casari,  
408 2018; Opalinska & Janska, 2018; Rainbolt, Lebeau, Puchades, & Wiseman, 2016). OMA1 is activated under  
409 stress conditions including membrane potential dissipation, decreased ATP levels, and oxidative stress,  
410 among other insults (Consolato et al., 2018). Upon activation, OMA1 cleaves the long isoform inducing  
411 cristae remodeling and cyt. c release (Arnoult, Grodet, Lee, Estaquier, & Blackstone, 2005; Frezza et al.,  
412 2006; Glytsou et al., 2016; Rainbolt et al., 2016; Scorrano et al., 2002). This mechanism can explain the



413 morphological and functional changes included by calcium overload that we observed in our cryo-EM images  
 414 and bioenergetics data.

415  
 416 Indeed, we demonstrated that calcium overload impairs mitochondrial ATP production at greater calcium  
 417 loads and depleting mitochondria of calcium did not fully restore function - indicating an irreversible  
 418 component. These data revealed an underappreciated energetic consequence of calcium overload on the  
 419 mitochondrial function that supports a direct role of the mitochondrial calcium buffering system. In cardiac  
 420 tissue, the steady-state cycling of calcium across plasma membranes maintains cytosolic calcium levels at  
 421 ~100 nM during diastole; however, the peak calcium concentration during systole can rise to the low  
 422 micromolar range (Balaban, 2002; Bazil et al., 2013; Boyman et al., 2014). Whether the mitochondria can  
 423 respond to these transient changes to meet metabolic demand is a subject of debate (reviewed in (Balaban,  
 424 2002)) that revolves around the mitochondrial calcium uniporter (MCU) being unable to approach maximum  
 425 flux rates in the transient rise of cytosolic calcium due to its low affinity for calcium (Marchi & Pinton, 2014).  
 426 Alternative hypotheses regarding calcium microdomains have been proposed in an attempt to argue in favor  
 427 of significant mitochondrial calcium uptake during systole (Csordás, 2001; De La Fuente et al., 2018; De la  
 428 Fuente & Sheu, 2019; Garcia-Perez, Hajnoczky, & Csordas, 2008; Hom & Sheu, 2009); however, direct  
 429 imaging studies do not support this (Boyman et al., 2014; Lukyanenko, Chikando, & Lederer, 2009). A recent  
 430 study by Wescott et. al found that physiological cytosolic calcium transients causes a gradual, step-wise  
 431 increase in matrix calcium concentration per beat rather than large transient peaks (Wescott et al., 2019).  
 432 They also showed that at high pacing rates, the matrix calcium concentration did not change any further.  
 433 Indeed, further studies are required to determine whether these results are due to equal influx and efflux of  
 434 calcium per cycle or due to calcium buffering. At this point, we believe the calcium buffering in the form of  
 435 calcium phosphate granules system becomes relevant. In a separate study, calcium phosphate granule  
 436 deposits were observed in the matrix near cristae junctions in a variety of different eukaryotic cells under  
 437 physiological conditions (Wolf et al., 2017). Given the relevance of calcium in bioenergetics, the presence of  
 438 these calcium deposits may exert some degree of control over mitochondrial signaling and metabolism.

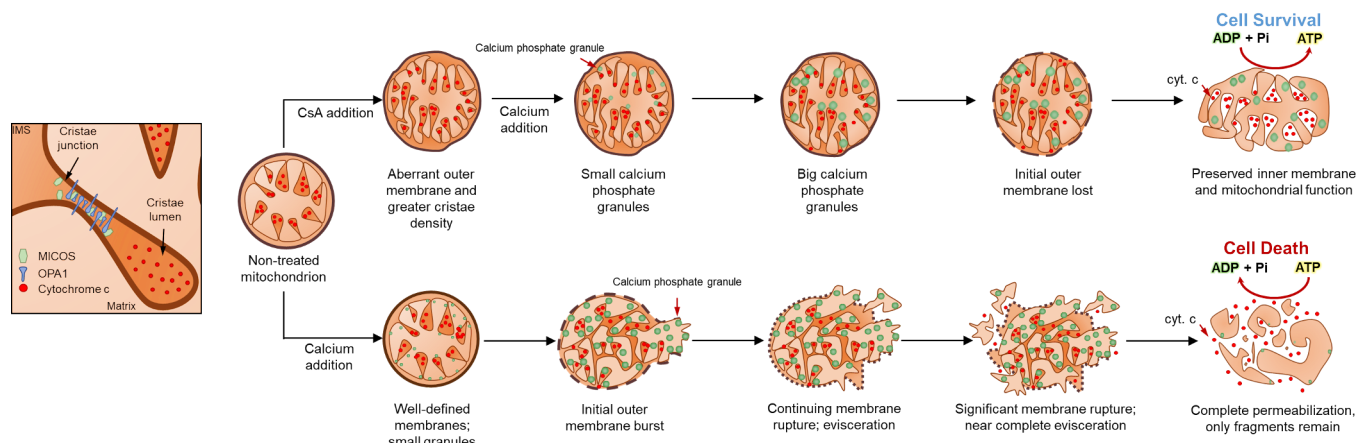

**Figure 8. Schematic representation of calcium overload leading to mitochondrial fragmentation and permeabilization.** In energized mitochondria, the mitochondrial membrane potential creates the driving force for calcium to accumulate in the mitochondrial matrix. The accumulation and growth of these complexes induces mitochondrial swelling that leads to outer membrane rupture, inner membrane fragmentation and cyt. c release. This causes membrane potential dissipation and induces the calcium-phosphate complex disassembly. CsA, however, alters the membrane morphologies and allows for robust calcium uptake after the addition of a calcium bolus. The inner mitochondrial membrane remains tethered and the cristae junctions intact. This avoids cyt. c remodeling and preserves the bioenergetic status despite the calcium effects on mitochondrial respiration.

439  
 440 In Figure 8, we present a model that accounts for various characteristics of membrane fragmentation before  
 441 the MPT onset. This model integrates findings from our cryo-EM analysis with mitochondrial function and  
 442 recapitulates the effects of calcium on the mitochondrial structure. Based on our findings, we believe that  
 443 changes in mitochondrial ultrastructure can explain the loss of mitochondrial function in calcium overload as  
 444 well as the protective effects of CsA. Our results suggest that mitochondrial outer membrane rupture and  
 445 inner membrane fragmentation are *caused* by calcium overload whereas the formation of granules are a  
 446 *consequence* of calcium uptake and accumulation. In the present study, the detrimental effects of calcium  
 447 overload on mitochondrial function are mitigated when CsA is present. Regardless of the calcium bolus, the

448 number and size of granules in CsA-treated mitochondria increased, suggesting that CsA increases the  
449 mitochondrial calcium buffering capacity, thus explaining why CsA allows robust calcium uptake and  
450 increases the threshold for permeability transition pore activation (Baines & Gutierrez-Aguilar, 2018; Bonora  
451 et al., 2013; De Marchi et al., 2014; Fournier et al., 1987).

452  
453 To interpret these results, we sought confirmation of our findings from work by others. A study by Pinton's  
454 group (Bonora et al., 2016) studied the effect of calcium overload on mitochondria in HeLa cells. Exposing  
455 HeLa cells to the ionophore ionomycin resulted in mitochondrial network fragmentation. However, in the  
456 presence of CsA, the mitochondrial network condensed and maintained its integrity after ionomycin  
457 treatment. In addition, a study looking at mitochondrial swelling using light transmittance in a single  
458 mitochondrion showed that calcium induces mitochondrial swelling in a concentration-dependent fashion  
459 (Shibata, Yoneda, Morikawa, & Ohta, 2019). CsA decreased this effect in a calcium-dependent manner,  
460 which led the authors to conclude that either CsA induces mitochondria shrinkage or calcium accumulation  
461 induces light scattering. We show that CsA increases the absorbance in a calcium-dependent manner and  
462 induces changes in mitochondria ultrastructure including condensed inner membranes and loss of outer  
463 membrane that often led to inner membrane unraveling. Therefore, our results are consistent with these  
464 studies but quantitatively describe the ultrastructural changes associated with calcium overload and how  
465 these changes are linked to mitochondrial function.

466  
467 A major challenge in this study is the lack of cristae structural definition in our set of images. As dynamic  
468 structures, cristae are the functional units of mitochondria that lock cyt. c in the cristae lumen and provide  
469 sufficient membrane surface area to sustain oxidative phosphorylation at high rates (Mannella, 2006;  
470 Scorrano et al., 2002). Under certain conditions when the cristae junctional width is enlarged, cyt. c escapes  
471 the lumen and causes loss of mitochondria function and cell death (Hessenberger et al., 2017; Ikon & Ryan,  
472 2017). While the expected outcomes during calcium overload were addressed, intricate details of the cristae  
473 structure including junction width, length, density, and shape must be incorporated to better understand the  
474 implications of cristae remodeling as key mediators in mitochondrial function. Earlier studies looking at  
475 calcium phosphate granule composition relied on staining, fixing or dehydrating samples, which introduce  
476 artifacts and make them less reliable (Brighton & Hunt, 1976; Carafoli, Rossi, & Lehninger, 1964; Greenawalt,  
477 Rossi, & Lehninger, 1964; Kristian, Weatherby, Bates, & Fiskum, 2002; Matthews & Martin, 1971). More  
478 recently, changes in mitochondrial structure were analyzed using high-pressure techniques and freeze-  
479 substitution to minimize sample structural distortion resulting from fixation or dehydration (Kristian,  
480 Pivovarova, Fiskum, & Andrews, 2007). However, structural details such as granule space distribution and  
481 structure are not as well defined with this method relative to the latest advanced cryo-EM techniques. Hence,  
482 visualization of the mitochondria in 3D by cryo-electron tomography (cryo-ET) would be an avenue for future  
483 studies to address. Nonetheless, our finding that CsA preserves the inner membrane integrity suggests that  
484 cristae remodeling and cyt. c release from the cristae lumen is likely avoided. This poses a new approach by  
485 which therapies targeting cristae remodeling can be identified to prevent pathological mitochondrial  
486 dysfunction leading to tissue injury.

## 487 488 489 **Conclusion**

490  
491 Mitochondrial calcium overload causes mitochondrial respiratory dysfunction through the well-established  
492 mitochondrial permeability transition phenomenon. However, the precise and quantitative causal mechanisms  
493 are only recently coming into focus. In this study, we have shown that calcium-induced inhibition of ADP-  
494 stimulated respiration is reversible for low-to-moderate calcium loads (0 – 250 nmol/mg) but only partially  
495 reversible for higher calcium loads (> 500 nmol/mg). Accumulating large quantities of calcium leads to the  
496 formation of calcium phosphate precipitates, outer membrane rupture, and eventually inner membrane  
497 fragmentation and evisceration. This results in loss of respiratory control and poor ATP synthesis rates.  
498 However, in the presence of CsA, the mitochondrial outer membrane is lost, but the ability of mitochondria to  
499 sequester significant amounts of calcium is retained with more abundant and larger calcium phosphate  
500 granules that persist. Here we conclude from our functional and structural data that CsA preserves the inner  
501 membrane integrity and mitochondrial function by preventing detrimental cristae remodeling associated with

502 calcium overload. These findings mechanistically link mitochondrial function to ultrastructure in the context of  
503 calcium overload and brings a new understanding of the calcium sequestration system in relation to energy  
504 metabolism, structure, and potential targets to prevent mitochondrial dysfunction.

505

506

## 507 **Acknowledgments**

508

509 The authors thank Dr. Alexander Makhov for technical support with cryo-electron microscopy. This work was  
510 supported in part by the Office of the Director, National Institutes of Health, under Award Number S10  
511 OD019995 (JFC). The content is solely the responsibility of the authors and does not necessarily represent  
512 the official views of the National Institutes of Health. The AAAS Marion Mason Milligan award provided  
513 funding for this project for Women in the Chemical Sciences, the JK Billman, Jr., MD Endowed Research  
514 Professorhip, and NIH R01 GM110185 (KNP).

515

516

## 517 **Declaration of Interests**

518

519 The authors declare no competing interests.

520

## References

- 521  
522  
523 Arnoult, D., Grodet, A., Lee, Y. J., Estaquier, J., & Blackstone, C. (2005). Release of OPA1 during apoptosis  
524 participates in the rapid and complete release of cytochrome c and subsequent mitochondrial  
525 fragmentation. *J Biol Chem*, *280*(42), 35742-35750. doi:10.1074/jbc.M505970200
- 526 Baines, C. P., & Gutierrez-Aguilar, M. (2018). The still uncertain identity of the channel-forming unit(s) of the  
527 mitochondrial permeability transition pore. *Cell Calcium*, *73*, 121-130. doi:10.1016/j.ceca.2018.05.003
- 528 Balaban, R. S. (2002). Cardiac energy metabolism homeostasis: role of cytosolic calcium. *J Mol Cell Cardiol*,  
529 *34*(10), 1259-1271. doi:10.1006/jmcc.2002.2082
- 530 Bazil, J. N., Blomeyer, C. A., Pradhan, R. K., Camara, A. K., & Dash, R. K. (2013). Modeling the calcium  
531 sequestration system in isolated guinea pig cardiac mitochondria. *J Bioenerg Biomembr*, *45*(3), 177-  
532 188. doi:10.1007/s10863-012-9488-2
- 533 Beavis, A. D., Brannan, R. D., & Garlid, K. D. (1985). Swelling and contraction of the mitochondrial matrix. I. A  
534 structural interpretation of the relationship between light scattering and matrix volume. *J Biol Chem*,  
535 *260*(25), 13424-13433.
- 536 Bernardi, P. (1992). Modulation of the mitochondrial cyclosporin A-sensitive permeability transition pore by  
537 the proton electrochemical gradient. Evidence that the pore can be opened by membrane  
538 depolarization. *J Biol Chem*, *267*(13), 8834-8839.
- 539 Bernardi, P. (1999). Mitochondrial transport of cations: channels, exchangers, and permeability transition.  
540 *Physiol Rev*, *79*(4), 1127-1155. doi:10.1152/physrev.1999.79.4.1127
- 541 Bernardi, P., Di Lisa, F., Fogolari, F., & Lippe, G. (2015). From ATP to PTP and Back: A Dual Function for the  
542 Mitochondrial ATP Synthase. *Circ Res*, *116*(11), 1850-1862. doi:10.1161/CIRCRESAHA.115.306557
- 543 Bonora, M., Bononi, A., De Marchi, E., Giorgi, C., Lebedzinska, M., Marchi, S., . . . Pinton, P. (2013). Role of  
544 the c subunit of the FO ATP synthase in mitochondrial permeability transition. *Cell Cycle*, *12*(4), 674-  
545 683. doi:10.4161/cc.23599
- 546 Bonora, M., Morganti, C., Morciano, G., Giorgi, C., Wieckowski, M. R., & Pinton, P. (2016). Comprehensive  
547 analysis of mitochondrial permeability transition pore activity in living cells using fluorescence-  
548 imaging-based techniques. *Nat Protoc*, *11*(6), 1067-1080. doi:10.1038/nprot.2016.064
- 549 Bonsi, P., Cuomo, D., Martella, G., Sciamanna, G., Tolu, M., Calabresi, P., . . . Pisani, A. (2006). Mitochondrial  
550 toxins in Basal Ganglia disorders: from animal models to therapeutic strategies. *Curr*  
551 *Neuropharmacol*, *4*(1), 69-75. doi:10.2174/157015906775203039
- 552 Boyman, L., Chikando, A. C., Williams, G. S., Khairallah, R. J., Kettlewell, S., Ward, C. W., . . . Lederer, W. J.  
553 (2014). Calcium movement in cardiac mitochondria. *Biophys J*, *107*(6), 1289-1301.  
554 doi:10.1016/j.bpj.2014.07.045
- 555 Brighton, C. T., & Hunt, R. M. (1976). Histochemical localization of calcium in growth plate mitochondria and  
556 matrix vesicles. *Fed Proc*, *35*(2), 143-147.
- 557 Brown, D. A., Hale, S. L., Baines, C. P., del Rio, C. L., Hamlin, R. L., Yueyama, Y., . . . Kloner, R. A. (2014).  
558 Reduction of early reperfusion injury with the mitochondria-targeting peptide bendavia. *J Cardiovasc*  
559 *Pharmacol Ther*, *19*(1), 121-132. doi:10.1177/1074248413508003
- 560 Brustovetsky, N., Brustovetsky, T., Purl, K. J., Capano, M., Crompton, M., & Dubinsky, J. M. (2003). Increased  
561 susceptibility of striatal mitochondria to calcium-induced permeability transition. *J Neurosci*, *23*(12),  
562 4858-4867. doi:10.1523/JNEUROSCI.23-12-04858.2003
- 563 Carafoli, E., Rossi, C. S., & Lehninger, A. L. (1964). Cation and Anion Balance during Active Accumulation of  
564 Ca<sup>++</sup> and Mg<sup>++</sup> by Isolated Mitochondria. *J Biol Chem*, *239*, 3055-3061.
- 565 Carroll, J., He, J., Ding, S., Fearnley, I. M., & Walker, J. E. (2019). Persistence of the permeability transition  
566 pore in human mitochondria devoid of an assembled ATP synthase. *Proc Natl Acad Sci U S A*, *116*(26),  
567 12816-12821. doi:10.1073/pnas.1904005116



- 568 Chalmers, S., & Nicholls, D. G. (2003). The relationship between free and total calcium concentrations in the  
569 matrix of liver and brain mitochondria. *J Biol Chem*, *278*(21), 19062-19070.  
570 doi:10.1074/jbc.M212661200
- 571 Chappell, J. B., & Crofts, A. R. (1965). Calcium Ion Accumulation and Volume Changes of Isolated Liver  
572 Mitochondria. Calcium Ion-Induced Swelling. *Biochem J*, *95*, 378-386.
- 573 Chinopoulos, C. (2018). Mitochondrial permeability transition pore: Back to the drawing board. *Neurochem*  
574 *Int*, *117*, 49-54. doi:10.1016/j.neuint.2017.06.010
- 575 Consolato, F., Maltecca, F., Tulli, S., Sambri, I., & Casari, G. (2018). m-AAA and i-AAA complexes coordinate to  
576 regulate OMA1, the stress-activated supervisor of mitochondrial dynamics. *J Cell Sci*, *131*(7).  
577 doi:10.1242/jcs.213546
- 578 Crompton, M., Ellinger, H., & Costi, A. (1988). Inhibition by cyclosporin A of a Ca<sup>2+</sup>-dependent pore in heart  
579 mitochondria activated by inorganic phosphate and oxidative stress. *Biochem J*, *255*(1), 357-360.
- 580 Csordás, G. T., A. P.; Hajnóczky, G. (2001). Calcium Signal Transmission between Ryanodine Receptors and  
581 Mitochondria in Cardiac Muscle. *Trends in Cardiovascular Medicine*, *11*(7), 269-275.  
582 doi:10.1016/s1050-1738(01)00123-2
- 583 De La Fuente, S., Lambert, J. P., Nichtova, Z., Fernandez Sanz, C., Elrod, J. W., Sheu, S. S., & Csordas, G.  
584 (2018). Spatial Separation of Mitochondrial Calcium Uptake and Extrusion for Energy-Efficient  
585 Mitochondrial Calcium Signaling in the Heart. *Cell Rep*, *24*(12), 3099-3107 e3094.  
586 doi:10.1016/j.celrep.2018.08.040
- 587 De la Fuente, S., & Sheu, S. S. (2019). SR-mitochondria communication in adult cardiomyocytes: A close  
588 relationship where the Ca<sup>2+</sup> has a lot to say. *Arch Biochem Biophys*, *663*, 259-268.  
589 doi:10.1016/j.abb.2019.01.026
- 590 De Marchi, E., Bonora, M., Giorgi, C., & Pinton, P. (2014). The mitochondrial permeability transition pore is a  
591 dispensable element for mitochondrial calcium efflux. *Cell Calcium*, *56*(1), 1-13.  
592 doi:10.1016/j.ceca.2014.03.004
- 593 Di Lisa, F., Menabò, R., Canton, M., Barile, M., & Bernardi, P. (2001). Opening of the mitochondrial  
594 permeability transition pore causes depletion of mitochondrial and cytosolic NAD<sup>+</sup> and is a causative  
595 event in the death of myocytes in postischemic reperfusion of the heart. *J Biol Chem*, *276*(4), 2571-  
596 2575. doi:10.1074/jbc.M006825200
- 597 Du, H., Guo, L., Fang, F., Chen, D., Sosunov, A. A., McKhann, G. M., . . . Yan, S. D. (2008). Cyclophilin D  
598 deficiency attenuates mitochondrial and neuronal perturbation and ameliorates learning and  
599 memory in Alzheimer's disease. *Nat Med*, *14*(10), 1097-1105. doi:10.1038/nm.1868
- 600 Eisner, V., Picard, M., & Hajnoczky, G. (2018). Mitochondrial dynamics in adaptive and maladaptive cellular  
601 stress responses. *Nat Cell Biol*, *20*(7), 755-765. doi:10.1038/s41556-018-0133-0
- 602 Eliaz, N., & Metoki, N. (2017). Calcium Phosphate Bioceramics: A Review of Their History, Structure,  
603 Properties, Coating Technologies and Biomedical Applications. *Materials (Basel)*, *10*(4).  
604 doi:10.3390/ma10040334
- 605 Elmore, S. P., Qian, T., Grissom, S. F., & Lemasters, J. J. (2001). The mitochondrial permeability transition  
606 initiates autophagy in rat hepatocytes. *The FASEB Journal*, *15*(12), 2286-2287. doi:10.1096/fj.01-  
607 0206fje
- 608 Fournier, N., Ducet, G., & Crevat, A. (1987). Action of cyclosporine on mitochondrial calcium fluxes. *J*  
609 *Bioenerg Biomembr*, *19*(3), 297-303. doi:10.1007/bf00762419
- 610 Frank, S., Gaume, B., Bergmann-Leitner, E. S., Leitner, W. W., Robert, E. G., Catez, F., . . . Youle, R. J. (2001).  
611 The role of dynamin-related protein 1, a mediator of mitochondrial fission, in apoptosis. *Dev Cell*,  
612 *1*(4), 515-525. doi:10.1016/s1534-5807(01)00055-7

- 613 Frezza, C., Cipolat, S., Martins de Brito, O., Micaroni, M., Beznoussenko, G. V., Rudka, T., . . . Scorrano, L.  
614 (2006). OPA1 controls apoptotic cristae remodeling independently from mitochondrial fusion. *Cell*,  
615 *126*(1), 177-189. doi:10.1016/j.cell.2006.06.025
- 616 Fridolfsson, H. N., Kawaraguchi, Y., Ali, S. S., Panneerselvam, M., Niesman, I. R., Finley, J. C., . . . Patel, H. H.  
617 (2012). Mitochondria-localized caveolin in adaptation to cellular stress and injury. *FASEB J*, *26*(11),  
618 4637-4649. doi:10.1096/fj.12-215798
- 619 Friedman, J. R., & Nunnari, J. (2014). Mitochondrial form and function. *Nature*, *505*(7483), 335-343.  
620 doi:10.1038/nature12985
- 621 Garcia-Perez, C., Hajnoczky, G., & Csordas, G. (2008). Physical coupling supports the local Ca<sup>2+</sup> transfer  
622 between sarcoplasmic reticulum subdomains and the mitochondria in heart muscle. *J Biol Chem*,  
623 *283*(47), 32771-32780. doi:10.1074/jbc.M803385200
- 624 Garlid, K. D., & Beavis, A. D. (1985). Swelling and contraction of the mitochondrial matrix. II. Quantitative  
625 application of the light scattering technique to solute transport across the inner membrane. *J Biol*  
626 *Chem*, *260*(25), 13434-13441.
- 627 Glancy, B., Willis, W. T., Chess, D. J., & Balaban, R. S. (2013). Effect of calcium on the oxidative  
628 phosphorylation cascade in skeletal muscle mitochondria. *Biochemistry*, *52*(16), 2793-2809.  
629 doi:10.1021/bi3015983
- 630 Glytsou, C., Calvo, E., Cogliati, S., Mehrotra, A., Anastasia, I., Rigoni, G., . . . Soriano, M. E. (2016). Optic  
631 Atrophy 1 Is Epistatic to the Core MICOS Component MIC60 in Mitochondrial Cristae Shape Control.  
632 *Cell Rep*, *17*(11), 3024-3034. doi:10.1016/j.celrep.2016.11.049
- 633 Greenawalt, J. W., Rossi, C. S., & Lehninger, A. L. (1964). Effect of Active Accumulation of Calcium and  
634 Phosphate Ions on the Structure of Rat Liver Mitochondria. *J Cell Biol*, *23*, 21-38.  
635 doi:10.1083/jcb.23.1.21
- 636 Hackenbrock, C. R., & Caplan, A. I. (1969). Ion-induced ultrastructural transformations in isolated  
637 mitochondria. The energized uptake of calcium. *J Cell Biol*, *42*(1), 221-234.
- 638 Halestrap, A. P., & Pasdois, P. (2009). The role of the mitochondrial permeability transition pore in heart  
639 disease. *Biochim Biophys Acta*, *1787*(11), 1402-1415. doi:10.1016/j.bbabi.2008.12.017
- 640 Hessenberger, M., Zerbes, R. M., Rampelt, H., Kunz, S., Xavier, A. H., Purfurst, B., . . . Daumke, O. (2017).  
641 Regulated membrane remodeling by Mic60 controls formation of mitochondrial crista junctions. *Nat*  
642 *Commun*, *8*, 15258. doi:10.1038/ncomms15258
- 643 Hom, J., & Sheu, S. S. (2009). Morphological dynamics of mitochondria--a special emphasis on cardiac muscle  
644 cells. *J Mol Cell Cardiol*, *46*(6), 811-820. doi:10.1016/j.yjmcc.2009.02.023
- 645 Hunter, D. R., & Haworth, R. A. (1979). The Ca<sup>2+</sup>-induced membrane transition in mitochondria. I. The  
646 protective mechanisms. *Arch Biochem Biophys*, *195*(2), 453-459.
- 647 Hunter, D. R., Haworth, R. A., & Southard, J. H. (1976). Relationship between configuration, function, and  
648 permeability in calcium-treated mitochondria. *J Biol Chem*, *251*(16), 5069-5077.
- 649 Hunter, F. E., Jr., Scott, A., Hoffsten, P. E., Guerra, F., Weinstein, J., Schneider, A., . . . Smith, E. (1964). Studies  
650 on the Mechanism of Ascorbate-Induced Swelling and Lysis of Isolated Liver Mitochondria. *J Biol*  
651 *Chem*, *239*, 604-613.
- 652 Ikon, N., & Ryan, R. O. (2017). Cardiolipin and mitochondrial cristae organization. *Biochim Biophys Acta*  
653 *Biomembr*, *1859*(6), 1156-1163. doi:10.1016/j.bbame.2017.03.013
- 654 Jadiya, P., Kolmetzky, D. W., Tomar, D., Di Meo, A., Lombardi, A. A., Lambert, J. P., . . . Elrod, J. W. (2019).  
655 Impaired mitochondrial calcium efflux contributes to disease progression in models of Alzheimer's  
656 disease. *Nat Commun*, *10*(1), 3885. doi:10.1038/s41467-019-11813-6
- 657 Jiang, S., Pan, H., Chen, Y., Xu, X., & Tang, R. (2015). Amorphous calcium phosphate phase-mediated crystal  
658 nucleation kinetics and pathway. *Faraday Discuss*, *179*, 451-461. doi:10.1039/c4fd00212a

- 659 Kim, S. Y., Shim, M. S., Kim, K. Y., Weinreb, R. N., Wheeler, L. A., & Ju, W. K. (2014). Inhibition of cyclophilin D  
660 by cyclosporin A promotes retinal ganglion cell survival by preventing mitochondrial alteration in  
661 ischemic injury. *Cell Death Dis*, 5, e1105. doi:10.1038/cddis.2014.80
- 662 Kristian, T., Pivovarova, N. B., Fiskum, G., & Andrews, S. B. (2007). Calcium-induced precipitate formation in  
663 brain mitochondria: composition, calcium capacity, and retention. *J Neurochem*, 102(4), 1346-1356.  
664 doi:10.1111/j.1471-4159.2007.04626.x
- 665 Kristian, T., Weatherby, T. M., Bates, T. E., & Fiskum, G. (2002). Heterogeneity of the calcium-induced  
666 permeability transition in isolated non-synaptic brain mitochondria. *J Neurochem*, 83(6), 1297-1308.  
667 doi:10.1046/j.1471-4159.2002.01238.x
- 668 Lehninger, A. L., & Remmert, L. F. (1959). An endogenous uncoupling and swelling agent in liver  
669 mitochondria and its enzymic formation. *J Biol Chem*, 234, 2459-2464.
- 670 Lim, K. H., Javadov, S. A., Das, M., Clarke, S. J., Suleiman, M. S., & Halestrap, A. P. (2002). The effects of  
671 ischaemic preconditioning, diazoxide and 5-hydroxydecanoate on rat heart mitochondrial volume and  
672 respiration. *J Physiol*, 545(3), 961-974. doi:10.1113/jphysiol.2002.031484
- 673 Lukyanenko, V., Chikando, A., & Lederer, W. J. (2009). Mitochondria in cardiomyocyte Ca<sup>2+</sup> signaling. *Int J*  
674 *Biochem Cell Biol*, 41(10), 1957-1971. doi:10.1016/j.biocel.2009.03.011
- 675 Malyala, S., Zhang, Y., Strubbe, J. O., & Bazil, J. N. (2019). Calcium phosphate precipitation inhibits  
676 mitochondrial energy metabolism. *PLoS Comput Biol*, 15(1), e1006719.  
677 doi:10.1371/journal.pcbi.1006719
- 678 Mancardi, G. H.-T., C. E.; Tommaso, D. D. ; de Leeuw, N. H. (2017). Detection of Posner's clusters during  
679 calcium phosphate nucleation: a molecular dynamics study. *Journal of Materials Chemistry B*,  
680 7274(5), 12. doi:10.1039/c7tb01199g
- 681 Mannella, C. A. (2006). Structure and dynamics of the mitochondrial inner membrane cristae. *Biochim*  
682 *Biophys Acta*, 1763(5-6), 542-548. doi:10.1016/j.bbamcr.2006.04.006
- 683 Mannella, C. A., Lederer, W. J., & Jafri, M. S. (2013). The connection between inner membrane topology and  
684 mitochondrial function. *J Mol Cell Cardiol*, 62, 51-57. doi:10.1016/j.yjmcc.2013.05.001
- 685 Marchi, S., Lupini, L., Patergnani, S., Rimessi, A., Missiroli, S., Bonora, M., . . . Pinton, P. (2013).  
686 Downregulation of the mitochondrial calcium uniporter by cancer-related miR-25. *Curr Biol*, 23(1), 58-  
687 63. doi:10.1016/j.cub.2012.11.026
- 688 Marchi, S., Patergnani, S., & Pinton, P. (2014). The endoplasmic reticulum-mitochondria connection: one  
689 touch, multiple functions. *Biochim Biophys Acta*, 1837(4), 461-469. doi:10.1016/j.bbabi.2013.10.015
- 690 Marchi, S., & Pinton, P. (2014). The mitochondrial calcium uniporter complex: molecular components,  
691 structure and physiopathological implications. *J Physiol*, 592(5), 829-839.  
692 doi:10.1113/jphysiol.2013.268235
- 693 Matthews, J. L., & Martin, J. H. (1971). Intracellular transport of calcium and its relationship to homeostasis  
694 and mineralization. *The American Journal of Medicine*, 50(5), 589-597. doi:10.1016/0002-  
695 9343(71)90114-8
- 696 McGee, A. M., & Baines, C. P. (2012). Phosphate is not an absolute requirement for the inhibitory effects of  
697 cyclosporin A or cyclophilin D deletion on mitochondrial permeability transition. *Biochem J*, 443(1),  
698 185-191. doi:10.1042/BJ20111881
- 699 Millay, D. P., Sargent, M. A., Osinska, H., Baines, C. P., Barton, E. R., Vuagniaux, G., . . . Molkentin, J. D. (2008).  
700 Genetic and pharmacologic inhibition of mitochondrial-dependent necrosis attenuates muscular  
701 dystrophy. *Nat Med*, 14(4), 442-447. doi:10.1038/nm1736
- 702 Nicholls, D. G., & Chalmers, S. (2004). The integration of mitochondrial calcium transport and storage. *J*  
703 *Bioenerg Biomembr*, 36(4), 277-281. doi:10.1023/B:JOB.0000041753.52832.f3
- 704 490840 [pii]

- 705 Onuma, K. I., A. (1998). Cluster Growth Model for Hydroxyapatite. *Chem. Mater*(10), 6.  
706 doi:10.1021/cm980062c
- 707 Opalinska, M., & Janska, H. (2018). AAA Proteases: Guardians of Mitochondrial Function and Homeostasis.  
708 *Cells*, 7(10). doi:10.3390/cells7100163
- 709 Pandya, J. D., Nukala, V. N., & Sullivan, P. G. (2013). Concentration dependent effect of calcium on brain  
710 mitochondrial bioenergetics and oxidative stress parameters. *Front Neuroenergetics*, 5, 10.  
711 doi:10.3389/fnene.2013.00010
- 712 Petronilli, V., Cola, C., Massari, S., Colonna, R., & Bernardi, P. (1993). Physiological effectors modify voltage  
713 sensing by the cyclosporin A-sensitive permeability transition pore of mitochondria. *J Biol Chem*,  
714 268(29), 21939-21945.
- 715 Pfanner, N., Warscheid, B., & Wiedemann, N. (2019). Mitochondrial proteins: from biogenesis to functional  
716 networks. *Nat Rev Mol Cell Biol*, 20(5), 267-284. doi:10.1038/s41580-018-0092-0
- 717 Porter, G. A., Jr., & Beutner, G. (2018). Cyclophilin D, Somehow a Master Regulator of Mitochondrial  
718 Function. *Biomolecules*, 8(4). doi:10.3390/biom8040176
- 719 Raaflaub, J. (1953). [Swelling of isolated mitochondria of the liver and their susceptibility to physicochemical  
720 influences]. *Helv Physiol Pharmacol Acta*, 11(2), 142-156.
- 721 Rainbolt, T. K., Lebeau, J., Puchades, C., & Wiseman, R. L. (2016). Reciprocal Degradation of YME1L and  
722 OMA1 Adapts Mitochondrial Proteolytic Activity during Stress. *Cell Rep*, 14(9), 2041-2049.  
723 doi:10.1016/j.celrep.2016.02.011
- 724 Scorrano, L., Ashiya, M., Buttle, K., Weiler, S., Oakes, S. A., Mannella, C. A., & Korsmeyer, S. J. (2002). A  
725 distinct pathway remodels mitochondrial cristae and mobilizes cytochrome c during apoptosis. *Dev*  
726 *Cell*, 2(1), 55-67. doi:10.1016/s1534-5807(01)00116-2
- 727 Shibata, T., Yoneda, M., Morikawa, D., & Ohta, Y. (2019). Time-lapse imaging of Ca(2+)-induced swelling and  
728 permeability transition: Single mitochondrion study. *Arch Biochem Biophys*, 663, 288-296.  
729 doi:10.1016/j.abb.2019.01.016
- 730 Tait, S. W., & Green, D. R. (2013). Mitochondrial regulation of cell death. *Cold Spring Harb Perspect Biol*, 5(9).  
731 doi:10.1101/cshperspect.a008706
- 732 Tang, G., Peng, L., Baldwin, P. R., Mann, D. S., Jiang, W., Rees, I., & Ludtke, S. J. (2007). EMAN2: an extensible  
733 image processing suite for electron microscopy. *J Struct Biol*, 157(1), 38-46.  
734 doi:10.1016/j.jsb.2006.05.009
- 735 Territo, P. R., Mootha, V. K., French, S. A., & Balaban, R. S. (2000). Ca(2+) activation of heart mitochondrial  
736 oxidative phosphorylation: role of the F(0)/F(1)-ATPase. *Am J Physiol Cell Physiol*, 278(2), C423-435.  
737 doi:10.1152/ajpcell.2000.278.2.C423
- 738 Wescott, A. P., Kao, J. P. Y., Lederer, W. J., & Boyman, L. (2019). Voltage-energized calcium-sensitive ATP  
739 production by mitochondria. *Nature Metabolism*, 1(10), 975-984. doi:10.1038/s42255-019-0126-8
- 740 Wolf, S. G., Mutsafi, Y., Dadosh, T., Ilani, T., Lansky, Z., Horowitz, B., . . . Fass, D. (2017). 3D visualization of  
741 mitochondrial solid-phase calcium stores in whole cells. *Elife*, 6. doi:10.7554/eLife.29929
- 742 Wollenman, L. C., Vander Ploeg, M. R., Miller, M. L., Zhang, Y., & Bazil, J. N. (2017). The effect of respiration  
743 buffer composition on mitochondrial metabolism and function. *PLoS One*, 12(11), e0187523.  
744 doi:10.1371/journal.pone.0187523
- 745 Youle, R. J., & Karbowski, M. (2005). Mitochondrial fission in apoptosis. *Nat Rev Mol Cell Biol*, 6(8), 657-663.  
746 doi:10.1038/nrm1697
- 747 Youle, R. J., & Narendra, D. P. (2011). Mechanisms of mitophagy. *Nat Rev Mol Cell Biol*, 12(1), 9-14.  
748 doi:10.1038/nrm3028
- 749
